# Supplementary material
Source: HighWire-hosted journal article supplement (https://bmjopen.bmj.com/content/13/4/e067223)
Supplement: inline-supplementary-material-1 [file inline-supplementary-material-1.pdf]

**How Do the Older Adults in Nursing Homes Live with Dignity? A Protocol for A  
Meta-Synthesis of Qualitative Research**

**Appendix 1**

| Database          | Total studies |
|-------------------|---------------|
| 1.Pubemd          | 137           |
| 2.Embase          | 194           |
| 3.Cochane library | 2             |
| 4. Web of science | 2764          |
| 5.CINAHL          | 3             |
