# Supplementary material
Source: HighWire-hosted journal article supplement (https://bmjopen.bmj.com/content/13/4/e067223)
Supplement: inline-supplementary-material-2 [file inline-supplementary-material-2.pdf]

## How Do the Older Adults in Nursing Homes Live with Dignity? A Protocol for A Meta-Synthesis of Qualitative Research

### Appendix 2 Search strategy (PubMed)

| Search step | Search query                                                                                                                                                                                                                                                                                                                                                                                                                                                                                                                                        | Results   |
|-------------|-----------------------------------------------------------------------------------------------------------------------------------------------------------------------------------------------------------------------------------------------------------------------------------------------------------------------------------------------------------------------------------------------------------------------------------------------------------------------------------------------------------------------------------------------------|-----------|
| #1          | "Aged"[MeSH Terms]                                                                                                                                                                                                                                                                                                                                                                                                                                                                                                                                  | 3434100   |
| #2          | "elderly"[Title/Abstract] OR "old"[Title/Abstract] OR "old people"[Title/Abstract] OR "older adults"[Title/Abstract] OR "older people"[Title/Abstract] OR ("person 65 years"[Title/Abstract] AND "older"[Title/Abstract]) OR "the older population"[Title/Abstract] OR "the elderly"[Title/Abstract] OR "elderly people"[Title/Abstract] OR "the aged"[Title/Abstract] OR (("aging"[MeSH Terms] OR "aging"[All Fields] OR "ageing"[All Fields]) AND "dependents"[Title/Abstract]) OR "seniors"[Title/Abstract] OR "senior citizens"[Title/Abstract] | 1,609,126 |
| #3          | #1or #2                                                                                                                                                                                                                                                                                                                                                                                                                                                                                                                                             | 4,557,441 |
| #4          | "Homes for the Aged"[MeSH Terms]                                                                                                                                                                                                                                                                                                                                                                                                                                                                                                                    | 14,703    |
| #5          | "old age homes"[Title/Abstract] OR "home old age"[Title/Abstract] OR (("home s"[ Title/Abstract] OR "homely"[ Title/Abstract] OR "Homes"[ Title/Abstract]) AND "old age"[Title/Abstract]) OR "old age home"[Title/Abstract]                                                                                                                                                                                                                                                                                                                         | 1131      |
| #6          | #4 or #5                                                                                                                                                                                                                                                                                                                                                                                                                                                                                                                                            | 15,276    |
| #7          | "Nursing Homes"[MeSH Terms]                                                                                                                                                                                                                                                                                                                                                                                                                                                                                                                         | 43,889    |
| #8          | nursing home"[Title/Abstract] OR "homes nursing"[Title/Abstract]                                                                                                                                                                                                                                                                                                                                                                                                                                                                                    | 25576     |
| #9          | #7 or #8                                                                                                                                                                                                                                                                                                                                                                                                                                                                                                                                            | 52184     |
| # 10        | "Long-Term Care"[MeSH Terms]                                                                                                                                                                                                                                                                                                                                                                                                                                                                                                                        | 28,186    |
| #11         | "care long term"[Title/Abstract] OR "long term care"[Title/Abstract] OR "residential care"[Title/Abstract]                                                                                                                                                                                                                                                                                                                                                                                                                                          | 29,880    |
| #12         | #10 or #11                                                                                                                                                                                                                                                                                                                                                                                                                                                                                                                                          | 46,575    |
| #13         | #6 or #9 or #12                                                                                                                                                                                                                                                                                                                                                                                                                                                                                                                                     | 92,836    |
| #14         | "Respect"[MeSH Terms]                                                                                                                                                                                                                                                                                                                                                                                                                                                                                                                               | 904       |

|     |                                                                                                                                               |           |
|-----|-----------------------------------------------------------------------------------------------------------------------------------------------|-----------|
| #15 | "personal respect"[Title/Abstract] OR<br>"respect personal"[Title/Abstract] OR<br>"Dignity"[Title/Abstract]                                   | 8,335     |
| #16 | #14 or #15                                                                                                                                    | 8,805     |
| #17 | "interview*"[Title/Abstract] OR "interviews<br>as topic"[MeSH Terms:noexp] OR<br>"experience*"[Text Word] OR<br>"qualitative"[Title/Abstract] | 1,811,480 |
| #18 | quantitative"[Title/Abstract]                                                                                                                 | 745,745   |
| #19 | #17 or #18                                                                                                                                    | 1,693,831 |
| #20 | #3 and #13 and #16 and #19                                                                                                                    | 137       |

### Appendix Search strategy (Cochrane Library)

| Search step | Search query                                                                                                                                                                                                                                      | Results |
|-------------|---------------------------------------------------------------------------------------------------------------------------------------------------------------------------------------------------------------------------------------------------|---------|
| #1          | Aged [MeSH descriptor]                                                                                                                                                                                                                            | 25481   |
| #2          | elderly OR Old OR old people OR older adults OR older people<br>OR person 65 years OR the older population OR the elderly OR<br>elderly people OR the aged OR aging dependents OR senior<br>citizens                                              | 853931  |
| #3          | #1 OR #2                                                                                                                                                                                                                                          | 860942  |
| #4          | homes for the aged [MeSH descriptor]                                                                                                                                                                                                              | 740     |
| #5          | Home, Old Age OR Homes, Old Age OR Old Age Home OR Old<br>Age Homes OR Nursing home OR Homes, Nursing OR Care,<br>Long-term OR Long Term Care OR residential care                                                                                 | 517160  |
| #6          | #4 OR #5                                                                                                                                                                                                                                          | 517500  |
| #7          | respect [MeSH descriptor]                                                                                                                                                                                                                         | 20      |
| #8          | Personal Respect OR Respect, personal OR dignity                                                                                                                                                                                                  | 14577   |
| #9          | #7 OR #8                                                                                                                                                                                                                                          | 14582   |
| #10         | qualitative research or qualitative stud* or focus group* or<br>interview* or semi-structured interview* or unstructured<br>interview* or narration or narrative or hermeneutic* or<br>phenomenolog* or phenomenological research or ethnographic | 655852  |

|     |                                                                                   |   |
|-----|-----------------------------------------------------------------------------------|---|
|     | research or thematic analys* or content analys* or grounded theory or experience* |   |
| #11 | #3 AND #6 AND #9 AND #10                                                          | 2 |

### Appendix Search strategy (Embase)

| Search step | Search query                                                                              | Results |
|-------------|-------------------------------------------------------------------------------------------|---------|
| #1          | aged/                                                                                     | 3550112 |
| #2          | elderly.mp.                                                                               | 689897  |
| #3          | old.mp.                                                                                   | 1816567 |
| #4          | old people.mp.                                                                            | 5925    |
| #5          | older adults.mp.                                                                          | 143740  |
| #6          | older people.mp.                                                                          | 48696   |
| #7          | person 65 years.mp.                                                                       | 15      |
| #8          | older.mp.                                                                                 | 769680  |
| #9          | the older population.mp.                                                                  | 9297    |
| #10         | the elderly.mp.                                                                           | 678838  |
| #11         | elderly people.mp.                                                                        | 31466   |
| #12         | the aged.mp.                                                                              | 5364997 |
| #13         | aging dependents.mp.                                                                      | 0       |
| #14         | seniors.mp.                                                                               | 12347   |
| #15         | senior citizens.mp.                                                                       | 1778    |
| #16         | #1 OR #2 OR #3 OR #4 OR #5 OR #6 OR #7 OR #8 OR #9 OR #10 OR #11 OR #12 OR #13 #14 OR #15 | 6958101 |
| #17         | home for the aged/                                                                        | 11438   |
| #18         | Home, Old Age.mp.                                                                         | 3       |
| #19         | Homes, Old Age.mp.                                                                        | 3       |
| 20          | Old Age Home.mp.                                                                          | 204     |
| 21          | Old Age Homes.mp.                                                                         | 297     |
| 22          | Nursing Homes.mp.                                                                         | 24691   |

|     |                                                                                                                                                                                                                                                                                                                                                 |         |
|-----|-------------------------------------------------------------------------------------------------------------------------------------------------------------------------------------------------------------------------------------------------------------------------------------------------------------------------------------------------|---------|
| 23  | nursing home/                                                                                                                                                                                                                                                                                                                                   | 61082   |
| 24  | Homes,Nursing.mp.                                                                                                                                                                                                                                                                                                                               | 109     |
| 25  | long term care/                                                                                                                                                                                                                                                                                                                                 | 145048  |
| 26  | Long-Term Care.mp.                                                                                                                                                                                                                                                                                                                              | 158259  |
| 27  | Care, Long-Term.mp.                                                                                                                                                                                                                                                                                                                             | 513     |
| 28  | residential care/                                                                                                                                                                                                                                                                                                                               | 13302   |
| 29  | #17 OR #18 #19 OR #20 OR #21 OR #22 OR #23<br>OR #24 OR #25 OR #26 OR #27 OR #28                                                                                                                                                                                                                                                                | 228740  |
| #30 | respect/                                                                                                                                                                                                                                                                                                                                        | 2354    |
| #31 | Personal Respect.mp.                                                                                                                                                                                                                                                                                                                            | 9       |
| #32 | Respect, Personal.mp.                                                                                                                                                                                                                                                                                                                           | 21      |
| #33 | Dignity.mp.                                                                                                                                                                                                                                                                                                                                     | 11543   |
| #34 | #30 OR #31 OR # 32 OR #33                                                                                                                                                                                                                                                                                                                       | 13715   |
| #35 | (qualitative research or qualitative stud* or focus group*<br>or interview* or semi-structured interview* or<br>unstructured interview* or narration or narrative or<br>hermeneutic* or phenomenolog* or phenomenological<br>research or ethnographic research or thematic analys* or<br>content analys* or grounded theory or experience*).mp. | 2522841 |
| #36 | #16 AND #29 AND #34 AND #35                                                                                                                                                                                                                                                                                                                     | 194     |

### Search strategy (Web of Science)

| Search step | Search query                                                                                                                                                                                                                                                                                                                           | Results    |
|-------------|----------------------------------------------------------------------------------------------------------------------------------------------------------------------------------------------------------------------------------------------------------------------------------------------------------------------------------------|------------|
| #1          | (((((TS=(Aged)) OR TS=(elderly)) OR TS=(old)) OR<br>TS=((old people)) OR TS=(older adults)) OR TS=(older people))<br>OR TS=(person 65 years)) OR TS=(older)) OR TS=(the older<br>population)) OR TS=(the elderly)) OR TS=(elderly people)) OR<br>TS=(the aged)) OR TS=(aging dependents)) OR TS=(seniors)) OR<br>TS=(senior citizens)) | 12,636,340 |

|    |                                                                                                                                                                                                                                                                                                                                 |           |
|----|---------------------------------------------------------------------------------------------------------------------------------------------------------------------------------------------------------------------------------------------------------------------------------------------------------------------------------|-----------|
| #2 | (((((TS=(Homes for the Aged)) OR TS=(Home, Old Age)) OR TS=(Homes, Old Age)) OR TS=(Old Age Home)) OR TS=(Old Age Homes)) OR TS=(Nursing Homes)) OR TS=(Nursing Home)) OR TS=(Homes, Nursing)) OR TS=(Long-Term Care)) OR TS=(Care, Long-Term)) OR TS=(Long Term Care)) OR TS=(residential care)                                | 508,359   |
| #3 | ((TS=(Respect)) OR TS=(Personal Respect)) OR TS=(Respect, Personal)) OR TS=(Dignity)                                                                                                                                                                                                                                            | 2,726,218 |
| #4 | TS=(qualitative research or qualitative stud* or focus group* or interview* or semi-structured interview* or unstructured interview* or narration or narrative or hermeneutic* or phenomenolog* or phenomenological research or ethnographic research or thematic analys* or content analys* or grounded theory or experience*) | 6,822,817 |
| #5 | #1 AND #2 AND #3 AND #4                                                                                                                                                                                                                                                                                                         | 2,764     |

**Search strategy (CINAHL)**

| Search step | Search query                                                                                                                                                                                                                                                         | Results |
|-------------|----------------------------------------------------------------------------------------------------------------------------------------------------------------------------------------------------------------------------------------------------------------------|---------|
| #1          | TI aged OR TI elderly OR TI old OR TI old people OR TI older adults OR TI older people OR TI person 65 years OR TI older OR TI the older population OR TI the elderly OR TI elderly people OR TI the aged OR TI aging dependents OR TI seniors OR TI senior citizens | 182,862 |
| #2          | TI Homes for the Aged OR TI Home, Old Age OR TI Homes, Old Age OR TI Old Age Home OR TI Old Age Homes OR TI Nursing Homes OR TI Nursing Home OR TI Homes, Nursing OR TI Long-Term Care OR TI Care, Long-Term OR TI Long Term Care OR TI residential care             | 32,347  |
| #3          | TI Respect OR TI Personal Respect OR TI Respect, Personal OR TI Dignity                                                                                                                                                                                              | 4,943   |

|    |                                                                                                                                                                                                                                                                                                                               |         |
|----|-------------------------------------------------------------------------------------------------------------------------------------------------------------------------------------------------------------------------------------------------------------------------------------------------------------------------------|---------|
| #4 | TI qualitative research or qualitative stud* or focus group* or interview* or semi-structured interview* or unstructured interview* or narration or narrative or hermeneutic* or phenomenolog* or phenomenological research or ethnographic research or thematic analys* or content analys* or grounded theory or experience* | 189,384 |
| #5 | #1 AND #2 AND #3 AND #4                                                                                                                                                                                                                                                                                                       | 3       |
