# Supplementary material
Source: HighWire-hosted journal article supplement (https://bmjopen.bmj.com/content/13/4/e067223)
Supplement: inline-supplementary-material-3 [file inline-supplementary-material-3.pdf]

How Do the Older Adults in Nursing Homes Live with Dignity? A Protocol for A  
Meta-Synthesis of Qualitative Research

Appendix 3 Abstract Selection form

| Time stamp | Author and date | Title | Is this a qualitative study? | Does the study present evidence of the elderly in nursing homes? | Does the study expresses the old people's understanding of dignity? | Initials of screener |
|------------|-----------------|-------|------------------------------|------------------------------------------------------------------|---------------------------------------------------------------------|----------------------|
|            |                 |       |                              |                                                                  |                                                                     |                      |
|            |                 |       |                              |                                                                  |                                                                     |                      |
|            |                 |       |                              |                                                                  |                                                                     |                      |
|            |                 |       |                              |                                                                  |                                                                     |                      |
