# Supplementary material
Source: HighWire-hosted journal article supplement (https://bmjopen.bmj.com/content/13/4/e067223)
Supplement: inline-supplementary-material-4 [file inline-supplementary-material-4.pdf]

How Do the Older Adults in Nursing Homes Live with Dignity? A Protocol for A  
Meta-Synthesis of Qualitative Research

Appendix 4: Full Article Screening Form

| Author<br>Date | Title | Is this a<br>qualitive<br>study ? | Does the study present<br>evidence of the elderly in<br>nursing homes? | Does the study<br>expresses the old<br>people's<br>understanding of<br>dignity? | Initials of the<br>screener |
|----------------|-------|-----------------------------------|------------------------------------------------------------------------|---------------------------------------------------------------------------------|-----------------------------|
|                |       |                                   |                                                                        |                                                                                 |                             |
|                |       |                                   |                                                                        |                                                                                 |                             |
|                |       |                                   |                                                                        |                                                                                 |                             |
|                |       |                                   |                                                                        |                                                                                 |                             |
