# Supplementary material
Source: HighWire-hosted journal article supplement (https://bmjopen.bmj.com/content/13/4/e067223)
Supplement: inline-supplementary-material-5 [file inline-supplementary-material-5.pdf]

How Do the Older Adults in Nursing Homes Live with Dignity? A Protocol for A

Meta-Synthesis of Qualitative Research

Appendix 5: Joanna Briggs Institute Critical Appraisal Domain

|                                                     |                                                           |                                                      |                                                               |                                                     |                                                             |                                                                    |                                                        |                                                                             |                                                           |
|-----------------------------------------------------|-----------------------------------------------------------|------------------------------------------------------|---------------------------------------------------------------|-----------------------------------------------------|-------------------------------------------------------------|--------------------------------------------------------------------|--------------------------------------------------------|-----------------------------------------------------------------------------|-----------------------------------------------------------|
| Congruous philosophical perspective and methodology | Congruous methodology and research question of objectives | Congruous methodology and methods of data collection | Congruous methodology and representation and analysis of data | Congruous methodology and interpretation of results | Statement locating the research culturally or theoretically | Influence of researcher on the research, and vice-versa, addressed | Participants, and their voices, adequately represented | Ethical study according to current criteria or evidence of ethical approval | Conclusions flow from analysis/interpretation of the data |
|                                                     |                                                           |                                                      |                                                               |                                                     |                                                             |                                                                    |                                                        |                                                                             |                                                           |
