# Supplementary material
Source: HighWire-hosted journal article supplement (https://bmjopen.bmj.com/content/13/4/e067223)
Supplement: inline-supplementary-material-6 [file inline-supplementary-material-6.pdf]

**How Do the Older Adults in Nursing Homes Live with Dignity? A Protocol for A****Meta-Synthesis of Qualitative Research****Appendix 6: Data Extraction Tool**

| Author, Date | Country | Title | Study aim | Study Design | Study setting | Study Population | Inclusion and exclusion criteria | Findings |
|--------------|---------|-------|-----------|--------------|---------------|------------------|----------------------------------|----------|
|              |         |       |           |              |               |                  |                                  |          |
|              |         |       |           |              |               |                  |                                  |          |
|              |         |       |           |              |               |                  |                                  |          |
