# Supplementary material
Source: HighWire-hosted journal article supplement (https://bmjopen.bmj.com/content/13/4/e067223)
Supplement: inline-supplementary-material-7 [file inline-supplementary-material-7.pdf]

Supplemental material

How Do the Older Adults in Nursing Homes Live with Dignity? A Protocol for A  
Meta-Synthesis of Qualitative Research

Appendix 7 Two reviewers' Cohen's kappa

Reviewer A: Kejimu Sunzi

Reviewer B: Cheng Lei

Yes: Included

No: Excluded

| Title and abstract screening |                       |                      |                            |                    |                   |                                    |                  |
|------------------------------|-----------------------|----------------------|----------------------------|--------------------|-------------------|------------------------------------|------------------|
|                              | Yes,<br>Reviewer<br>A | No,<br>Reviewer<br>A | Proportionate<br>Agreement | Yes<br>Probability | No<br>Probability | Random<br>Agreement<br>Probability | Cohen's<br>Kappa |
| Yes,<br>Reviewer<br>B        |                       |                      |                            |                    |                   |                                    |                  |
| No,<br>Reviewer<br>B         |                       |                      |                            |                    |                   |                                    |                  |
| Full text screening          |                       |                      |                            |                    |                   |                                    |                  |
|                              | Yes,<br>Reviewer<br>A | No,<br>Reviewer<br>A | Proportionate<br>Agreement | Yes<br>Probability | No<br>Probability | Random<br>Agreement<br>Probability | Cohen's<br>Kappa |
| Yes,<br>Reviewer<br>B        |                       |                      |                            |                    |                   |                                    |                  |
| No,<br>Reviewer<br>B         |                       |                      |                            |                    |                   |                                    |                  |
